# Supplementary material for: Reorganization of the Landscape of Translated mRNAs in NSUN2-Deficient Cells and Specific Features of NSUN2 Target mRNAs
Source: MDPI journal article supplement (doi:10.3390/ijms23179740), 2022-08-28
Supplement: s1 [file s1]

## Supplementary Materials

### Figures

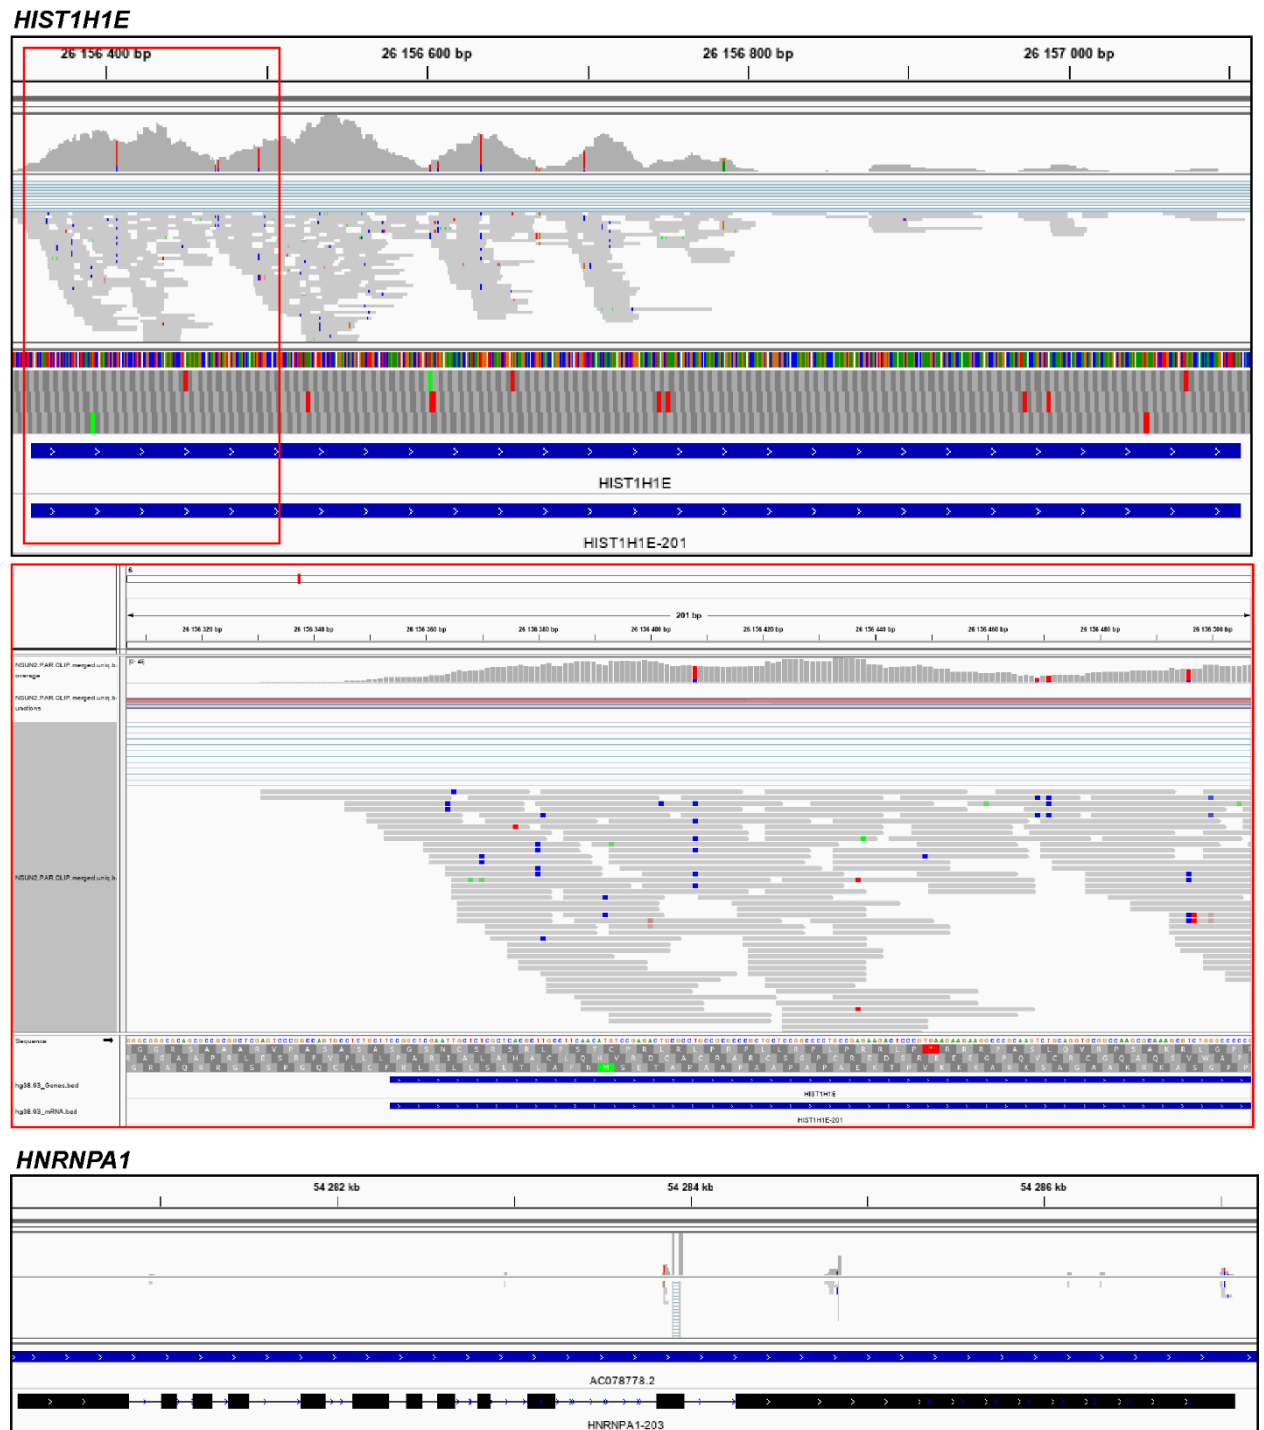

**Figure S1.** The IGV genome browser view of regions of the human genome corresponding to the *HIST1H1E* gene with the mapped sequencing reads obtained by the NGS of the RNA fragments cross-linked to NSUN2. Red box shows zoomed region of the browser view. The positions of the T/C transitions in the reads are visible as vertically repeating blue dashes above the T letters in the sequence line. View of the *HNRNPA1* gene regions showing no reads is presented as a control for the specificity of pull-down of the NSUN2-cross-linked mRNA fragments.

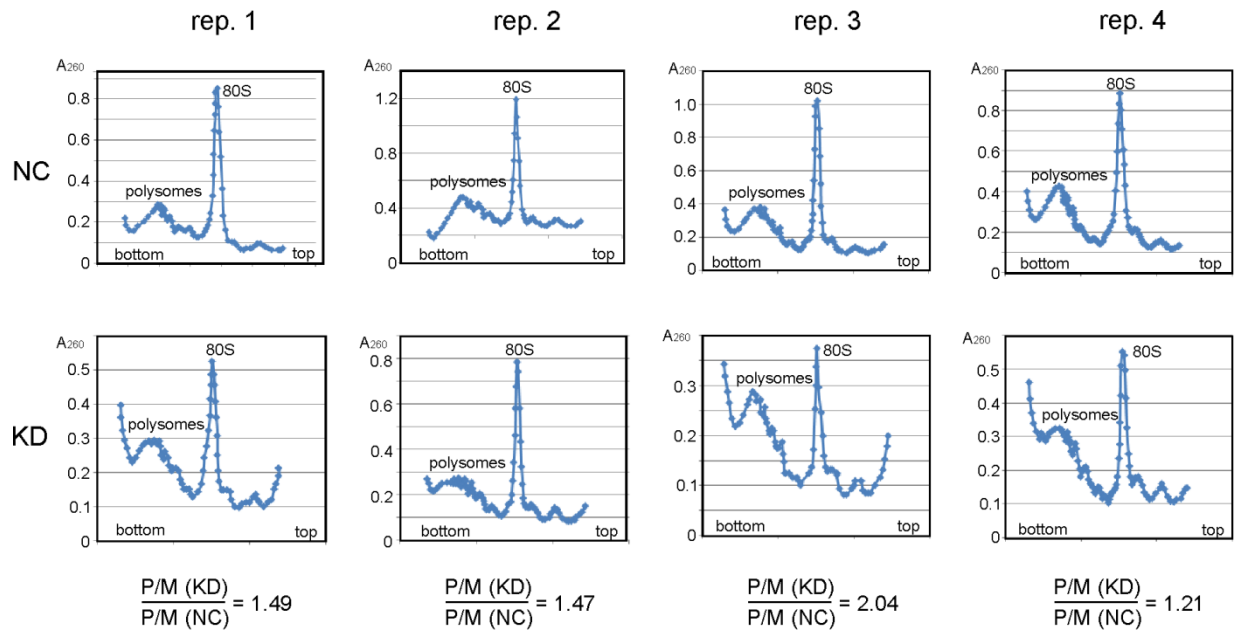

**Figure S2.** Polysome profiles obtained by centrifugation in sucrose-density gradient of the lysates from HEK293T cells transfected with either NSUN2 mRNA-specific siRNAs (KD) or non-targeting siRNAs (NC) in four replicates. Peaks corresponding to polysomes and 80S monosomes are marked. The ratios P/M(KD):P/M(NC) determined from replicates are shown.

## Tables

**Table S1.** The metadata of NSUN2 cellular RNA-targets identified by PAR-CLIP (the Excel table). (Sheet 1) The comprehensively annotated clusters of reads containing T/C-transitions identified with the use of the wavClusterR. (Sheet 2) The distribution of the read clusters across mRNA features. (Sheet 3) The annotated clusters containing T/C-transitions in protein-coding genes. (Sheet 4) A comparison of RNA-targets for NSUN2 (this work) and YBX1 (ref. [21] in the main text) identified by PAR-CLIP.

**Table S2.** The sequences of siRNAs used in this work. The sense (S) and antisense (AS) strands of siRNA duplexes targeting to NSUN2 mRNA (NSUN2) or of those non-targeting to it, control (NC), are shown.

| Index     | Sequence                                  |
|-----------|-------------------------------------------|
| NSUN2-S1  | 5'-ggaugguguauuccacgug <b>dttdt</b> -3'   |
| NSUN2-AS1 | 5'-cacguggaauacaccaucc <b>dttdt</b> -3'   |
| NSUN2-S2  | 5'-cacguguucacuaaacccuau <b>dttdt</b> -3' |
| NSUN2-AS2 | 5'-auaggguuuagugaacacgug <b>dttdt</b> -3' |
| NC-S1     | 5'-uucuccgaacgugucacgud <b>dttdt</b> -3'  |
| NC-AS1    | 5'-acgugacacguucggagaa <b>dttdt</b> -3'   |
| NC-S2     | 5'-uuguucgaacgugucacgud <b>dttdt</b> -3'  |
| NC-AS2    | 5'-acgugacacguucgaacaa <b>dttdt</b> -3'   |

**Table S3.** The differential expression analysis results of the RNA-seq data obtained with total RNA from cells with and without NSUN2 knockdown (Excel table). (Sheet 1) The metadata obtained with the use of DESeq2. (Sheets 2 and 3) The subsets of tDEGs with cutoffs ( $p_{adj} < 0.05$ ,  $|LFC| > 0.585$ ).

**Table S4.** The results of the differential expression analyses of the RNA-seq data obtained with polysome-associated mRNA from cells with and without NSUN2 knockdown (Excel table). (Sheet 1) The

metadata obtained with the use of DESeq2. (Sheets 2 and 3) The subsets of pDEGs with cutoffs ( $p \text{ adj} < 0.05$ ,  $|\text{LFC}| > 0.585$ ).

**Table S5.** The GO enrichment analysis (Excel table). Analyses of the sets of up-regulated (up) and down-regulated (down) tDEGs, pDEGs and GATEs in the biological process (BP) and cellular component (CC) categories.

**Table S6.** The analysis of genes with altered translational efficiencies (GATEs) based on the NGS data obtained with total and polysome-associated mRNA from cells with and without NSUN2 knockdown (Excel table). (Sheet 1) The metadata obtained with the use of DESeq2. (Sheets 2 and 3) The subsets of up-regulated (up) and down-regulated (down) GATEs with cutoffs ( $p \text{ adj} < 0.05$ ,  $|\text{LFC}| > 0.585$ ).

**Table S7.** The list of oligonucleotide primers used for RT-qPCR.

| Gene           | Forward primer                 | Reverse primer                |
|----------------|--------------------------------|-------------------------------|
| <i>NSUN2</i>   | 5'-gaacttgctggcacacaaat-3'     | 5'-tgctaacagcttcttgacgacta-3' |
| <i>TPM4</i>    | 5'-aatttcagagagaacggttgc-3'    | 5'-cagtgtctgatgtaagccac-3'    |
| <i>SRM</i>     | 5'-ctaccaggacatcctcgtcttc-3'   | 5'-agaggcaggttgccgatcatct-3'  |
| <i>NAMPT</i>   | 5'-atcctgttcaggctattctgt-3'    | 5'-ccccatattttctcacacgcat-3'  |
| <i>SRP54</i>   | 5'-aactcttggtatggcgaca-3'      | 5'-gtctcgcaacgtaaaactgacc-3'  |
| <i>SEPTIN7</i> | 5'-ctcacaccagaggaaatgccaac-3'  | 5'-ccacagcaagaggtaaacggtc-3'  |
| <i>STMN3</i>   | 5'-tgctcctgcttctacacacagc-3'   | 5'-gacaggtcagaaggggacttga-3'  |
| <i>GAPDH</i>   | 5'-gtgaaccatgagaagtatgacaac-3' | 5'-catgagtcctccacgatacc-3'    |
